# Supplementary material for: Comparative genomics using Fugu reveals insights into regulatory subfunctionalization
Source: Springer Nature journal article supplement (doi:10.1186/gb-2007-8-4-r53), 2007-04-11
Supplement: Additional file 2 [file gb-2007-8-4-r53-s2.doc]

**Additional file 2. Changes in the number of CNEs conserved in each *Fugu* co-ortholog correlates with changes in the size of genomic DNA in which CNE are identified.** Description: Genomic distance is measured as the length of DNA between the furthest overlapping CNEs (i.e. CNEs conserved in both co-orthologs) upstream and downstream of the co-ortholog gene in kilobases. The number of CNEs represents only those CNEs that were located within this defined genomic region.
